# Supplementary material for: Slow magnetic relaxation in a cyano-bridged ferromagnetic {FeIIINiII} alternating chain
Source: Royal Society of Chemistry journal article supplement (doi:10.1039/c3dt50273b), 2013-01-01
Supplement: c3dt50273b.pdf [file c3dt50273b.pdf]

## Slow magnetic relaxation in a cyano-bridged ferromagnetic {Fe<sup>III</sup>Ni<sup>II</sup>} alternating chain

Da-Peng Dong,<sup>a</sup> Yan-Juan Zhang,<sup>\*a</sup> Hui Zheng,<sup>b</sup> Peng-Fei Zhuang,<sup>b</sup> Liang Zhao,<sup>b</sup> Yang Xu,<sup>b</sup> Jixiang Hu,<sup>b</sup> Tao Liu,<sup>\*b</sup> Chun-Ying Duan<sup>b</sup>

<sup>a</sup>Chemistry College, Dalian University of Technology, Dalian 116024, China; E-mail: yanjuanzhang@dlut.edu.

<sup>b</sup>State Key Laboratory of Fine Chemicals, Dalian University of Technology, Dalian, 116024, China. E-mail:liutao@dlut.edu.cn;

### Contents

- 1. Fig. S1** Thermal variation of the real parts of the ac susceptibilities  $\chi''T$  of compound **1** under a zero dc-field in the temperature range of 2–300 K with a 30e ac field.
- 2. Table S1** Selected bond lengths (Å) and angles (°) for compound **1**.

1.

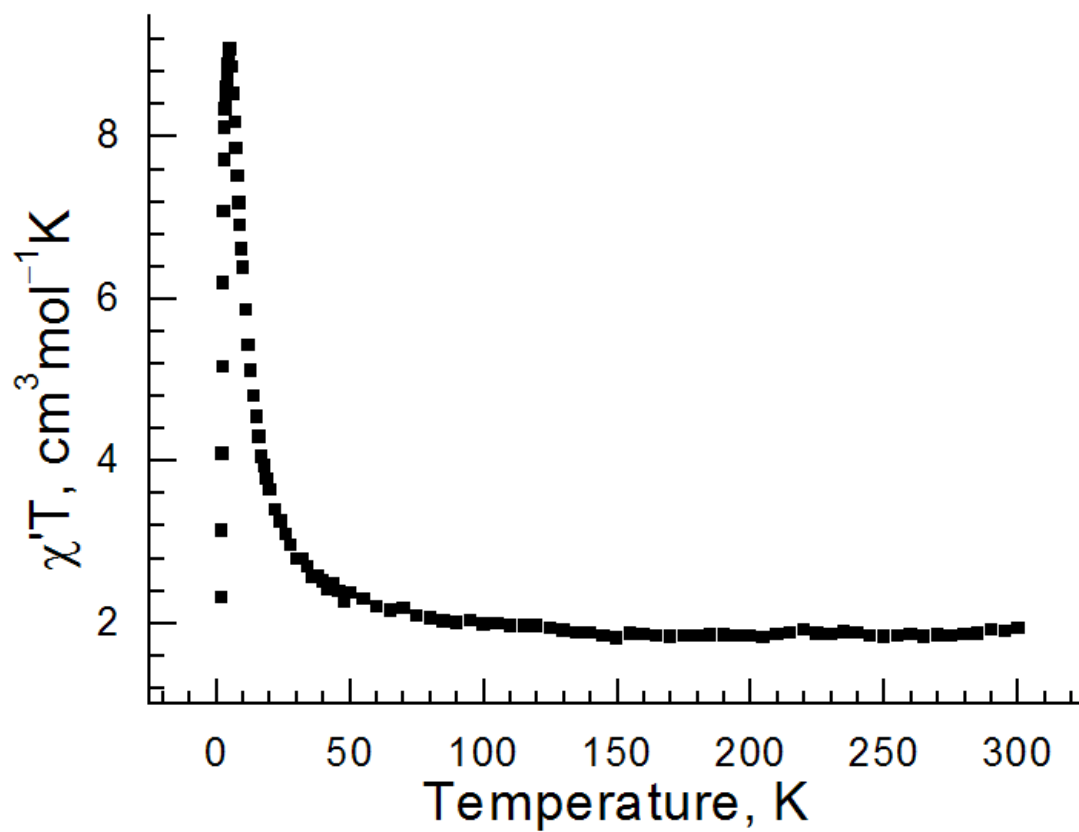

**Fig. S1.** Thermal variation of the real parts of the ac susceptibilities  $\chi'T$  of compound **1** under a zero dc-field in the temperature range of 2–300 K with a 30e ac field.

2. **Table 2** Selected bond lengths (Å) and angles (°) for **1**.

|                       |            |                       |            |
|-----------------------|------------|-----------------------|------------|
| Ni(1)-N(15)           | 2.085(4)   | Ni(2)-N(12)           | 2.097(4)   |
| Ni(1)-N(15)#1         | 2.085(4)   | Ni(2)-N(11)#2         | 2.132(4)   |
| Ni(1)-N(14)#1         | 2.107(4)   | Ni(2)-N(11)           | 2.132(4)   |
| Ni(1)-N(14)           | 2.107(4)   | Fe(1)-C(14)           | 1.916(4)   |
| Ni(1)-N(10)           | 2.128(4)   | Fe(1)-C(15)           | 1.924(5)   |
| Ni(1)-N(10)#1         | 2.128(4)   | Fe(1)-C(13)           | 1.928(5)   |
| Ni(2)-N(13)           | 2.080(4)   | Fe(1)-N(4)            | 1.966(4)   |
| Ni(2)-N(13)#2         | 2.080(4)   | Fe(1)-N(2)            | 1.977(4)   |
| Ni(2)-N(12)#2         | 2.097(4)   | Fe(1)-N(6)            | 1.991(3)   |
|                       |            |                       |            |
| N(15)-Ni(1)-N(15)#1   | 180.0      | N(12)#2-Ni(2)-N(11)#2 | 92.50(16)  |
| N(15)-Ni(1)-N(14)#1   | 97.22(14)  | N(12)-Ni(2)-N(11)#2   | 87.50(16)  |
| N(15)#1-Ni(1)-N(14)#1 | 82.78(14)  | N(13)-Ni(2)-N(11)     | 89.42(16)  |
| N(15)-Ni(1)-N(14)     | 82.78(14)  | N(13)#2-Ni(2)-N(11)   | 90.58(16)  |
| N(15)#1-Ni(1)-N(14)   | 97.22(14)  | N(12)#2-Ni(2)-N(11)   | 87.50(16)  |
| N(14)#1-Ni(1)-N(14)   | 180.000(1) | N(12)-Ni(2)-N(11)     | 92.50(16)  |
| N(15)-Ni(1)-N(10)     | 89.94(15)  | N(11)#2-Ni(2)-N(11)   | 180.0(3)   |
| N(15)#1-Ni(1)-N(10)   | 90.06(15)  | C(14)-Fe(1)-C(15)     | 84.87(18)  |
| N(14)#1-Ni(1)-N(10)   | 93.25(15)  | C(14)-Fe(1)-C(13)     | 87.03(18)  |
| N(14)-Ni(1)-N(10)     | 86.75(15)  | C(15)-Fe(1)-C(13)     | 91.12(19)  |
| N(15)-Ni(1)-N(10)#1   | 90.06(15)  | C(14)-Fe(1)-N(4)      | 94.77(16)  |
| N(15)#1-Ni(1)-N(10)#1 | 89.94(15)  | C(15)-Fe(1)-N(4)      | 177.95(17) |
| N(14)#1-Ni(1)-N(10)#1 | 86.75(15)  | C(13)-Fe(1)-N(4)      | 90.87(17)  |
| N(14)-Ni(1)-N(10)#1   | 93.25(15)  | C(14)-Fe(1)-N(2)      | 93.09(16)  |
| N(10)-Ni(1)-N(10)#1   | 180.000(1) | C(15)-Fe(1)-N(2)      | 90.86(17)  |
| N(13)-Ni(2)-N(13)#2   | 180.00(16) | C(13)-Fe(1)-N(2)      | 178.01(17) |
| N(13)-Ni(2)-N(12)#2   | 97.39(16)  | N(4)-Fe(1)-N(2)       | 87.15(15)  |
| N(13)#2-Ni(2)-N(12)#2 | 82.61(16)  | C(14)-Fe(1)-N(6)      | 176.89(17) |
| N(13)-Ni(2)-N(12)     | 82.61(16)  | C(15)-Fe(1)-N(6)      | 92.10(17)  |
| N(13)#2-Ni(2)-N(12)   | 97.39(16)  | C(13)-Fe(1)-N(6)      | 92.35(16)  |
| N(12)#2-Ni(2)-N(12)   | 180.000(1) | N(4)-Fe(1)-N(6)       | 88.28(15)  |
| N(13)-Ni(2)-N(11)#2   | 90.58(16)  | N(2)-Fe(1)-N(6)       | 87.63(15)  |
| N(13)#2-Ni(2)-N(11)#2 | 89.42(16)  |                       |            |

Symmetry transformations used to generate equivalent atoms for **1**: #1  $-x-1, -y, -z+1$  #2  $-x, -y+1, -z+1$ .
